# Supplementary material
Source: ML conference proceedings conference paper supplement (https://openreview.net/forum?id=nEX2q5B2RQ)
Supplement: supplementary_material [file attachment]

在utilis.py中的第75行可以看到计算ntk的函数：

返回的数值： grads_left_x是用来计算grand matrix. ll和rr对应label的one-hot形式 和one-hot形式的转置。

输入的数值: net是整个网络以及网络的参数，val_bound_one_batch是用于计算NTK的data


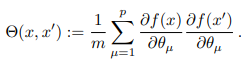


计算ntk的函数在model的第十三行有详细的过程 如果有需要请随时联系我
